# Supplementary material
Source: Research Square preprint supplement (doi:10.21203/rs.3.rs-9785945/v1)
Supplement: Supplementary file 1 [file e25dc0e72a10ca281d63c179.docx]

Appendix table 1: Multivariate Association Between Hematocrit Levels and Neurological Deterioration (Defined as an Increase in NIHSS Score by ≥1 Point)

| Outcome Event | HCT Grouping | OR  (Model 1) | Adjusted OR  (Model 2) (95% CI) | P-Value (Model 2) | Adjusted OR (Model 3)  (95% CI) | P-Value (Model 3) |
| --- | --- | --- | --- | --- | --- | --- |
| HCT (Trisection) | Q1 (Ref) | Ref | Ref | / | Ref | / |
| Q2 | — | 0.590 (0.411–0.847) | 0.004 | 0.606 (0.421–0.872) | 0.007 |
| Q3 | — | 0.688 (0.480–0.986) | 0.042 | 0.705 (0.484–1.027) | 0.069 |
| HCT (Quartering) | Q1 (Ref) | Ref | Ref | / | Ref | / |
| Q2 | — | 0.766 (0.519–1.129) | 0.178 | 0.790 (0.534–1.168) | 0.237 |
| Q3 | — | 0.624 (0.413–0.943) | 0.025 | 0.639 (0.421–0.971) | 0.036 |
| Q4 | — | 0.588 (0.384–0.902) | 0.015 | 0.604 (0.390–0.938) | 0.025 |

Notes: HCT (Trisection) and HCT (Quartering) refer to grouping by hematocrit levels into three and four sections, respectively. Ref indicates the reference group for comparison.

Odds ratios (OR) are presented with 95% confidence intervals (CI). Model 1 represents unadjusted analyses. Model 2 adjusts for age and sex. Model 3 further adjusts for significant univariate predictors and clinically relevant variables. P-values less than 0.05 are considered statistically significant and are marked in bold. Abbreviations: HCT = Hematocrit; NIHSS = National Institutes of Health Stroke Scale;

Appendix table 2: Multivariate Analysis of Hematocrit (HCT) Levels and the Risk of Neurological Deterioration (ΔNIHSS ≥ 2 Points)

| Outcome Event | HCT Grouping | OR (Model 1) | Adjusted OR (Model 2) (95% CI) | P-Value (Model 2) | Adjusted OR (Model 3) (95% CI) | P-Value (Model 3) |
| --- | --- | --- | --- | --- | --- | --- |
| HCT (Trisection) | Q1 (Ref) | Ref | Ref | / | Ref | / |
| Q2 | — | 0.522 (0.325–0.839) | 0.007 | 0.539 (0.334–0.869) | 0.011 |
| Q3 | — | 0.532 (0.325–0.871) | 0.012 | 0.547 (0.327–0.914) | 0.021 |
| HCT (Quartering) | Q1 (Ref) | Ref | Ref | / | Ref | / |
| Q2 | — | 0.918 (0.567–1.488) | 0.73 | 0.965 (0.593–1.570) | 0.886 |
| Q3 | — | 0.502 (0.283–0.888) | 0.018 | 0.514 (0.289–0.917) | 0.024 |
| Q4 | — | 0.442 (0.240–0.814) | 0.009 | 0.455 (0.243–0.849) | 0.013 |
| HCT (Median) | <41.3 | Ref | Ref | / | Ref | / |
| ≥41.3 (3m_death) | — | 0.202 (0.043–0.937) | 0.041 | 0.216 (0.044–1.057) | 0.059 |
| ≥41.3 (6m_death) | — | 0.590 (0.270–1.292) | 0.187 | 0.591 (0.260–1.342) | 0.209 |
| ≥41.3 (1y_death) | — | Ref | / | Ref | / |
| HCT (Inflection) | <38.4 | Ref | Ref | / | Ref | / |
| ≥38.4 (3m_death) | — | 0.278 (0.048–1.611) | 0.153 | 0.181 (0.023–1.444) | 0.107 |
| ≥38.4 (6m_death) | — | 0.524 (0.183–1.504) | 0.23 | 0.592 (0.196–1.788) | 0.353 |
| ≥38.4 (1y_death) | — | 0.651 (0.317–1.338) | 0.243 | 0.674 (0.318–1.429) | 0.304 |

Notes: HCT (Trisection), HCT (Quartering), HCT (Median), and HCT (Inflection) refer to different methods of grouping hematocrit levels into three sections, four sections, median-based groups, and inflection-based groups, respectively. Q1 serves as the reference group for comparison.Odds ratios (OR) are presented with 95% confidence intervals (CI). Model 1 represents unadjusted analyses. Model 2 adjusts for age and sex. Model 3 further adjusts for significant univariate predictors, including baseline NIHSS, and other clinically relevant variables. P-values less than 0.05 are considered statistically significant and are indicated in bold. Abbreviations: HCT = Hematocrit; NIHSS = National Institutes of Health Stroke Scale; ΔNIHSS = Change in NIHSS Score; m3 = 3 months; m6 = 6 months; y1 = 1 year.

Appendix Table 3: Multivariate Analysis of Hematocrit (HCT) Levels and the Risk of Neurological Deterioration (ΔNIHSS ≥ 3 Points)

| **Outcome Event** | **HCT Grouping** | **OR (Model 1)** | **Adjusted OR (Model 2) (95% CI)** | **P-Value (Model 2)** | **Adjusted OR (Model 3) (95% CI)** | **P-Value (Model 3)** |
| --- | --- | --- | --- | --- | --- | --- |
| **HCT (Trisection)** | **Q1 (Ref)** | Ref | Ref | / | Ref | / |
| **Q2** | — | 0.628 (0.352–1.120) | 0.115 | 0.677 (0.377–1.214) | 0.190 |
| **Q3** | — | 0.462 (0.238–0.897) | **0.023** | 0.548 (0.275–1.094) | 0.088 |
| **HCT (Quartering)** | **Q1 (Ref)** | Ref | Ref | / | Ref | / |
| **Q2** | — | 1.276 (0.698–2.331) | 0.429 | 1.314 (0.714–2.418) | 0.381 |
| **Q3** | — | 0.541 (0.253–1.158) | 0.114 | 0.593 (0.275–1.279) | 0.183 |
| **Q4** | — | 0.461 (0.202–1.050) | 0.065 | 0.540 (0.232–1.257) | 0.153 |

Notes: HCT Grouping: HCT (Trisection) and HCT (Quartering) refer to grouping by hematocrit levels into three and four sections, respectively. Q1 is the reference group for comparison. Odds Ratios (OR): Presented with 95% confidence intervals (CI). Model 1 represents unadjusted analyses. Model 2 adjusts for age and sex. Model 3 further adjusts for significant univariate predictors and clinically relevant variables. P-Values: Values less than 0.05 are considered statistically significant and are indicated in bold.

Abbreviations: HCT = Hematocrit; NIHSS = National Institutes of Health Stroke Scale; ΔNIHSS = Change in NIHSS Score.

Appendix Table 4: Multivariate Analysis of Hematocrit (HCT) Levels and the Risk of Neurological Deterioration (ΔNIHSS ≥ 4 Points)

| Outcome Event | HCT Grouping | OR (Model 1) | Adjusted OR (Model 2) (95% CI) | P-Value (Model 2) | Adjusted OR (Model 3) (95% CI) | P-Value (Model 3) |
| --- | --- | --- | --- | --- | --- | --- |
| HCT (Trisection) | Q1 (Ref) | Ref | Ref | / | Ref | / |
| Q2 | — | 0.612 (0.300–1.248) | 0.177 | 0.655 (0.318–1.349) | 0.251 |
| Q3 | — | 0.492 (0.222–1.089) | 0.08 | 0.670 (0.290–1.546) | 0.348 |
| HCT (Quartering) | Q1 (Ref) | Ref | Ref | / | Ref | / |
| Q2 | — | 1.346 (0.649–2.793) | 0.425 | 1.350 (0.642–2.838) | 0.429 |
| Q3 | — | 0.569 (0.230–1.409) | 0.223 | 0.619 (0.247–1.554) | 0.308 |
| Q4 | — | 0.371 (0.127–1.081) | 0.069 | 0.489 (0.163–1.469) | 0.202 |

Notes:HCT Grouping: Refers to the classification of hematocrit levels using trisection and quartering methods. Q1 serves as the reference group for comparison. Odds Ratios (OR): Presented with 95% confidence intervals (CI). Model 1 represents unadjusted analyses. Model 2 adjusts for age and sex. Model 3 further adjusts for significant univariate predictors and relevant clinical variables. P-Values: Values less than 0.05 are considered statistically significant and are indicated in bold. Abbreviations: HCT = Hematocrit; NIHSS = National Institutes of Health Stroke Scale; ΔNIHSS = Change in NIHSS Score.

Appendix Table 5: Multivariate Analysis of Hematocrit (HCT) Levels and Changes in NIHSS Scores Across Motor and Sensory Subgroups

| Outcome Event | Condition | OR (Model 1) | Adjusted OR (Model 2) (95% CI) | P-Value (Model 2) | Adjusted OR (Model 3) (95% CI) | P-Value (Model 3) |
| --- | --- | --- | --- | --- | --- | --- |
| NIHSS ≥ 1 | Motor ability < 1 | — | 0.992 (0.980–1.004) | 0.214 | 0.993 (0.981–1.005) | 0.268 |
| Motor ability ≥ 1 | — | 0.930 (0.888–0.975) | 0.003 | 0.923 (0.878–0.971) | 0.002 |
| Sentience < 1 | — | 0.986 (0.977–0.995) | 0.004 | 0.987 (0.978–0.996) | 0.006 |
| Sentience ≥ 1 | — | 0.997 (0.956–1.040) | 0.889 | 0.999 (0.950–1.052) | 0.977 |
| NIHSS ≥ 2 | Motor ability < 2 | — | 0.985 (0.964–1.006) | 0.161 | 0.986 (0.965–1.008) | 0.213 |
| Motor ability ≥ 2 | — | 0.958 (0.935–0.982) | <0.001 | 0.958 (0.934–0.982) | <0.001 |
| Sentience < 2 | — | 0.985 (0.973–0.997) | 0.015 | 0.986 (0.974–0.998) | 0.026 |
| Sentience ≥ 2 | — | 0.942 (0.901–0.984) | 0.008 | 0.930 (0.881–0.981) | 0.008 |
| NIHSS ≥ 3 | Motor ability < 3 | — | 0.978 (0.944–1.013) | 0.22 | 0.976 (0.940–1.012) | 0.191 |
| Motor ability ≥ 3 | — | 0.984 (0.964–1.004) | 0.109 | 0.987 (0.966–1.008) | 0.221 |
| Sentience < 3 | — | 0.993 (0.976–1.011) | 0.457 | 0.995 (0.977–1.013) | 0.593 |
| Sentience ≥ 3 | — | 0.938 (0.899–0.979) | 0.003 | 0.931 (0.883–0.981) | 0.008 |
| NIHSS ≥ 4 | Motor ability < 4 | — | 0.951 (0.892–1.014) | 0.122 | 0.726 (0.490–1.076) | 0.111 |
| Motor ability ≥ 4 | — | 0.985 (0.964–1.008) | 0.197 | 0.995 (0.970–1.020) | 0.684 |
| Sentience < 4 | — | 0.994 (0.972–1.017) | 0.627 | 0.997 (0.974–1.021) | 0.814 |
| Sentience ≥ 4 | — | 0.949 (0.910–0.988) | 0.012 | 0.927 (0.873–0.985) | 0.015 |

Notes: Outcome Event: Refers to different levels of neurological deterioration, defined by NIHSS score changes (≥1, ≥2, ≥3, and ≥4 points).

Condition: Subgroups based on motor ability and sensory function scores. Motor ability scores are categorized as <1, ≥1, <2, ≥2, and so on, while sensory function is divided similarly.Odds Ratios (OR): OR values are presented with 95% confidence intervals (CI). Model 1 represents unadjusted analyses. Model 2 adjusts for age and sex. Model 3 further adjusts for significant univariate predictors and clinically relevant variables.

P-Values: P-values less than 0.05 are considered statistically significant and are indicated in bold.Abbreviations: HCT = Hematocrit; NIHSS = National Institutes of Health Stroke Scale; ΔNIHSS = Change in NIHSS Score.

Appendix Table 6: Interaction Effects Between Hematocrit (HCT) Levels and Other Variables on Neurological Deterioration (ΔNIHSS ≥ 1 Point)

| **Outcome Event** | **Condition** | **OR (Model 1)** | **Adjusted OR (Model 2) (95% CI)** | **P-Value (Model 2)** | **P-Value for Interaction (Model 2)** | **Adjusted OR (Model 3) (95% CI)** | **P-Value (Model 3)** | **P-Value for Interaction (Model 3)** |
| --- | --- | --- | --- | --- | --- | --- | --- | --- |
| **Age** | **< 65** | **—** | **0.982 (0.970–0.993)** | **0.002** | **0.160** | **0.982 (0.971–0.993)** | **0.002** | **0.159** |
| **≥ 65** | **—** | **0.992 (0.981–1.005)** | **0.219** |  | **0.994 (0.982–1.006)** | **0.314** |  |
| **Gender** | **Male** | **—** | **0.987 (0.977–0.996)** | **0.006** | **0.923** | **0.987 (0.978–0.997)** | **0.010** | **0.968** |
| **Female** | **—** | **0.994 (0.971–1.004)** | **0.129** |  | **0.986 (0.970–1.003)** | **0.117** |  |
| **Disease Time** | **< 24h** | **—** | **0.991 (0.980–1.001)** | **0.068** | **0.532** | **0.991 (0.981–1.001)** | **0.076** | **0.562** |
| **24-48h** | **—** | **0.981 (0.961–1.002)** | **0.073** |  | **0.990 (0.967–1.012)** | **0.368** |  |
| **> 48h** | **—** | **0.980 (0.959–1.000)** | **0.051** |  | **0.977 (0.956–0.999)** | **0.036** |  |
| **Maternal Artery Stenosis** | **No** | **—** | **0.984 (0.975–1.015)** | **0.002** | **0.789** | **0.985 (0.975–0.995)** | **0.003** | **0.772** |
| **< 50%** | **—** | **0.992 (0.973–1.011)** | **0.389** |  | **0.994 (0.975–1.015)** | **0.580** |  |
| **≥ 50%** | **—** | **1.011 (0.960–1.066)** | **0.669** |  | **1.007 (0.955–1.061)** | **0.804** |  |
| **MPV** | **Q1** | **—** | **0.979 (0.965–0.994)** | **0.006** | **0.361** | **0.981 (0.966–0.996)** | **0.011** | **0.366** |
| **Q2** | **—** | **0.992 (0.977–1.007)** | **0.297** |  | **0.992 (0.977–1.007)** | **0.315** |  |
| **Q3** | **—** | **0.986 (0.971–1.001)** | **0.047** |  | **0.986 (0.972–1.001)** | **0.067** |  |
| **PLT** | **Q1** | **—** | **0.982 (0.968–0.997)** | **0.018** | **0.383** | **0.983 (0.970–0.997)** | **0.030** | **0.343** |
| **Q2** | **—** | **0.982 (0.969–0.996)** | **0.011** |  | **0.983 (0.970–0.997)** | **0.018** |  |
| **Q3** | **—** | **0.994 (0.979–1.009)** | **0.451** |  | **0.986 (0.972–1.001)** | **0.630** |  |
| **Location of Disease** | **Medial Perforating Branches** | **—** | **0.988 (0.977–0.999)** | **0.037** | **0.732** | **0.990 (0.978–1.001)** | **0.076** | **0.655** |
| **Pons** | **—** | **0.985 (0.973–0.997)** | **0.019** |  | **0.985 (0.973–0.997)** | **0.020** |  |
| **Baseline NIHSS** | **< 3** | **—** | **0.989 (0.979–1.000)** | **0.050** | **0.586** | **0.990 (0.978–1.001)** | **0.078** | **0.603** |
| **≥ 3** | **—** | **0.984 (0.971–0.997)** | **0.018** |  | **0.985 (0.971–0.998)** | **0.025** |  |
| **Smoking History** | **No** | **—** | **0.991 (0.981–1.001)** | **0.090** | **0.266** | **0.992 (0.981–1.002)** | **0.126** | **0.265** |
| **Yes** | **—** | **0.981 (0.967–0.995)** | **0.007** |  | **0.982 (0.968–0.996)** | **0.011** |  |
| **Site of Disease** | **Middle Cerebral Artery Perforating Branch** | **—** | **0.988 (0.977–0.999)** | **0.037** | **0.732** | **0.990 (0.978–1.001)** | **0.076** | **0.655** |
| **Pontine Artery Perforating Branch** | **—** | **0.985 (0.973–0.997)** | **0.019** |  | **0.985 (0.973–0.997)** | **0.020** |  |

Notes: Outcome Event: Refers to different demographic, clinical, and anatomical conditions influencing the interaction with hematocrit (HCT) levels. Odds Ratios (OR): Presented with 95% confidence intervals (CI). Model 1 represents unadjusted analyses. Model 2 adjusts for age and sex. Model 3 further adjusts for significant univariate predictors and clinically relevant variables. P-Values: P-values less than 0.05 are considered statistically significant and are indicated in bold. P-Value for Interaction: Indicates the significance of the interaction between HCT levels and each condition or variable. Abbreviations: HCT = Hematocrit; NIHSS = National Institutes of Health Stroke Scale; MPV = Mean Platelet Volume; PLT = Platelet Count.

Appendix Table 7: Interaction Effects Between Hematocrit (HCT) Levels and Other Variables on Neurological Deterioration (ΔNIHSS ≥ 2 Points)

| Outcome Event | Condition | OR (Model 1) | Adjusted OR (Model 2) (95% CI) | P-Value (Model 2) | P-Value for Interaction (Model 2) | Adjusted OR (Model 3) (95% CI) | P-Value (Model 3) | P-Value for Interaction (Model 3) |
| --- | --- | --- | --- | --- | --- | --- | --- | --- |
| Age | < 65 | — | 0.970 (0.956–0.985) | <0.001 | 0.036 | 0.972 (0.957–0.986) | <0.001 | 0.037 |
| ≥ 65 | — | 0.992 (0.977–1.007) | 0.298 |  | 0.994 (0.979–1.010) | 0.455 |  |
| Gender | Male | — | 0.981 (0.968–0.993) | 0.002 | 0.821 | 0.982 (0.969–0.994) | 0.004 | 0.761 |
| Female | — | 0.986 (0.966–1.006) | 0.177 |  | 0.985 (0.965–1.007) | 0.176 |  |
| Disease Time | < 24h | — | 0.986 (0.973–0.999) | 0.029 | 0.475 | 0.986 (0.974–0.999) | 0.034 | 0.548 |
| 24-48h | — | 0.974 (0.949–0.999) | 0.042 |  | 0.984 (0.957–1.012) | 0.261 |  |
| > 48h | — | 0.970 (0.939–1.002) | 0.069 |  | 0.970 (0.937–1.004) | 0.083 |  |
| Maternal Artery Stenosis | No | — | 0.985 (0.972–0.998) | 0.022 | 0.568 | 0.986 (0.973–1.000) | 0.044 | 0.523 |
| < 50% | — | 0.972 (0.951–0.994) | 0.011 |  | 0.972 (0.951–0.994) | 0.014 |  |
| ≥ 50% | — | 1.037 (0.935–1.150) | 0.494 |  | 1.032 (0.939–1.134) | 0.518 |  |
| Occlusion | — | 0.970 (0.929–1.013) | 0.174 |  | 0.969 (0.925–1.016) | 0.192 |  |
| MPV | Q1 | — | 0.980 (0.962–0.999) | 0.041 | 0.915 | 0.981 (0.962–1.000) | 0.051 | 0.939 |
| Q2 | — | 0.981 (0.962–1.000) | 0.054 |  | 0.983 (0.963–1.002) | 0.085 |  |
| Q3 | — | 0.981 (0.964–0.999) | 0.038 |  | 0.982 (0.964–1.000) | 0.049 |  |
| PLT | Q1 | — | 0.985 (0.965–1.005) | 0.137 | 0.236 | 0.986 (0.966–1.007) | 0.203 | 0.204 |
| Q2 | — | 0.971 (0.954–0.988) | 0.001 |  | 0.974 (0.956–0.991) | 0.004 |  |
| Q3 | — | 0.988 (0.970–1.006) | 0.201 |  | 0.992 (0.972–1.011) | 0.379 |  |
| Location of Disease | Medial Perforating Branches | — | 0.978 (0.964–0.993) | 0.003 | 0.473 | 0.981 (0.966–0.995) | 0.010 | 0.570 |
| Pons | — | 0.986 (0.970–1.002) | 0.086 |  | 0.985 (0.969–1.002) | 0.080 |  |
| Baseline NIHSS | < 3 | — | 0.985 (0.972–0.998) | 0.026 | 0.676 | 0.986 (0.973–1.000) | 0.004 | 0.684 |
| ≥ 3 | — | 0.979 (0.962–0.996) | 0.015 |  | 0.980 (0.962–0.997) | 0.025 |  |
| Smoking History | No | — | 0.990 (0.977–1.003) | 0.127 | 0.062 | 0.991 (0.978–1.005) | 0.196 | 0.061 |
| Yes | — | 0.968 (0.950–0.985) | <0.001 |  | 0.968 (0.950–0.987) | <0.001 |  |
| Site of Disease | Middle Cerebral Artery Perforating Branch | — | 0.978 (0.977–0.993) | 0.003 | 0.473 | 0.981 (0.966–0.995) | 0.010 | 0.570 |
| Pontine Artery Perforating Branch | — | 0.986 (0.970–1.002) | 0.086 |  | 0.985 (0.969–1.002) | 0.080 |  |

Notes: Outcome Event: Represents the interaction between HCT levels and various demographic, clinical, and anatomical factors, measured by the change in NIHSS scores (ΔNIHSS ≥ 2 Points). Odds Ratios (OR): Presented with 95% confidence intervals (CI). Model 1 represents unadjusted analyses. Model 2 adjusts for age and sex. Model 3 further adjusts for significant univariate predictors and clinically relevant variables.

P-Values: P-values less than 0.05 are considered statistically significant and are indicated in bold. P-Value for Interaction: Indicates the significance of the interaction between HCT levels and each variable or condition. Abbreviations: HCT = Hematocrit; NIHSS = National Institutes of Health Stroke Scale; MPV = Mean Platelet Volume; PLT = Platelet Count.

Appendix Table 8: Interaction Effects Between Hematocrit (HCT) Levels and Other Variables on Neurological Deterioration (ΔNIHSS ≥ 3 Points)

| Outcome Event | Condition | OR (Model 1) | Adjusted OR (Model 2) (95% CI) | P-Value (Model 2) | P-Value for Interaction (Model 2) | Adjusted OR (Model 3) (95% CI) | P-Value (Model 3) | P-Value for Interaction (Model 3) |
| --- | --- | --- | --- | --- | --- | --- | --- | --- |
| Age | < 65 | — | 0.974 (0.955–0.993) | 0.007 | 0.183 | 0.976 (0.957–0.995) | 0.013 | 0.175 |
|  | ≥ 65 | — | 0.993 (0.974–1.012) | 0.443 |  | 0.997 (0.977–1.017) | 0.748 |  |
| Gender | Male | — | 0.982 (0.965–0.999) | 0.043 | 0.844 | 0.984 (0.966–1.001) | 0.065 | 0.792 |
|  | Female | — | 0.990 (0.967–1.014) | 0.409 |  | 0.990 (0.966–1.014) | 0.410 |  |
| Disease Time | < 24h | — | 0.992 (0.975–1.008) | 0.322 | 0.249 | 0.993 (0.976–1.011) | 0.457 | 0.249 |
|  | 24-48h | — | 0.969 (0.937–1.001) | 0.056 |  | 0.975 (0.941–1.009) | 0.146 |  |
|  | > 48h | — | 0.956 (0.915–0.999) | 0.046 |  | 0.952 (0.908–0.999) | 0.046 |  |
| Maternal Artery Stenosis | No | — | 0.980 (0.964–0.997) | 0.02 | 0.704 | 0.983 (0.966–1.000) | 0.054 | 0.688 |
|  | < 50% | — | 0.983 (0.955–1.011) | 0.228 |  | 0.981 (0.953–1.011) | 0.218 |  |
|  | ≥ 50% | — | 1.153 (0.806–1.651) | 0.436 |  | 1.117 (0.790–1.579) | 0.530 |  |
|  | Occlusion | — | 0.995 (0.940–1.053) | 0.859 |  | 0.989 (0.935–1.047) | 0.713 |  |
| MPV | Q1 | — | 0.968 (0.945–0.992) | 0.008 | 0.177 | 0.966 (0.943–0.991) | 0.007 | 0.166 |
|  | Q2 | — | 1.000 (0.971–1.030) | 0.993 |  | 1.003 (0.973–1.034) | 0.850 |  |
|  | Q3 | — | 0.984 (0.963–1.006) | 0.150 |  | 0.985 (0.963–1.008) | 0.199 |  |
| PLT | Q1 | — | 0.978 (0.953–1.002) | 0.075 | 0.115 | 0.986 (0.966–1.006) | 0.215 | 0.077 |
|  | Q2 | — | 0.967 (0.944–0.990) | 0.006 |  | 0.970 (0.947–0.994) | 0.016 |  |
|  | Q3 | — | 1.001 (0.976–1.027) | 0.953 |  | 1.004 (0.977–1.031) | 0.768 |  |
| Location of Disease | Medial Perforating Branches | — | 0.981 (0.963–1.000) | 0.049 | 0.663 | 0.985 (0.966–1.005) | 0.139 | 0.854 |
|  | Pons | — | 0.985 (0.965–1.006) | 0.156 |  | 0.984 (0.963–1.005) | 0.131 |  |
| Baseline NIHSS | < 3 | — | 0.985 (0.968–1.002) | 0.081 | 0.930 | 0.986 (0.969–1.004) | 0.119 | 0.848 |
|  | ≥ 3 | — | 0.985 (0.963–1.007) | 0.190 |  | 0.986 (0.962–1.010) | 0.241 |  |
| Smoking History | No | — | 0.990 (0.974–1.007) | 0.252 | 0.170 | 0.992 (0.975–1.010) | 0.381 | 0.166 |
|  | Yes | — | 0.972 (0.948–0.996) | 0.023 |  | 0.973 (0.949–0.998) | 0.034 |  |
| Site of Disease | Middle Cerebral Artery Perforating Branch | — | 0.981 (0.963–1.000) | 0.049 | 0.663 | 0.985 (0.966–1.005) | 0.139 | 0.854 |
|  | Pontine Artery Perforating Branch | — | 0.985 (0.965–1.006) | 0.156 |  | 0.984 (0.963–1.005) | 0.131 |  |

Notes: Outcome Event: Represents the interaction between HCT levels and various demographic, clinical, and anatomical factors, measured by the change in NIHSS scores (ΔNIHSS ≥ 3 Points). Odds Ratios (OR): Presented with 95% confidence intervals (CI). Model 1 represents unadjusted analyses. Model 2 adjusts for age and sex. Model 3 further adjusts for significant univariate predictors and clinically relevant variables. P-Values: P-values less than 0.05 are considered statistically significant and are indicated in bold. P-Value for Interaction: Indicates the significance of the interaction between HCT levels and each variable or condition.

Abbreviations: HCT = Hematocrit; NIHSS = National Institutes of Health Stroke Scale; MPV = Mean Platelet Volume; PLT = Platelet Count.

Appendix Table 9: Interaction Effects Between Hematocrit (HCT) Levels and Other Variables on Neurological Deterioration (ΔNIHSS ≥ 4 Points)

| Outcome Event | Condition | OR (Model 1) | Adjusted OR (Model 2) (95% CI) | P-Value (Model 2) | P-Value for Interaction (Model 2) | Adjusted OR (Model 3) (95% CI) | P-Value (Model 3) | P-Value for Interaction (Model 3) |
| --- | --- | --- | --- | --- | --- | --- | --- | --- |
| Age | < 65 | — | 0.975 (0.952–0.998) | 0.033 | 0.363 | 0.976 (0.954–1.001) | 0.057 | 0.352 |
|  | ≥ 65 | — | 0.989 (0.967–1.012) | 0.343 |  | 0.995 (0.971–1.020) | 0.708 |  |
| Gender | Male | — | 0.981 (0.959–1.003) | 0.094 | 0.904 | 0.984 (0.962–1.006) | 0.157 | 0.950 |
|  | Female | — | 0.992 (0.966–1.019) | 0.561 |  | 0.991 (0.965–1.019) | 0.540 |  |
| Disease Time | < 24h | — | 0.992 (0.975–1.012） | 0.322 | 0.249 | 0.993 (0.973–1.017) | 0.626 | 0.254 |
|  | 24-48h | — | 0.967 (0.931–1.004) | 0.080 |  | 0.972 (0.934–1.012) | 0.164 |  |
|  | > 48h | — | 0.926 (0.853–1.004) | 0.063 |  | 0.912 (0.825–1.007) | 0.069 |  |
| Maternal Artery Stenosis | No | — | 0.983 (0.963–1.004) | 0.106 | 0.976 | 0.983 (0.966–1.000) | 0.256 | 0.980 |
|  | < 50% | — | 0.977 (0.946–1.010) | 0.172 |  | 0.981 (0.953–1.011) | 0.184 |  |
|  | ≥ 50% | — | 0.988 (0.932–1.047) | 0.672 |  | 0.983 (0.928–1.042) | 0.575 |  |
| MPV | Q1 | — | 0.969 (0.942–0.996) | 0.027 | 0.296 | 0.967 (0.969–1.048) | 0.027 | 0.232 |
|  | Q2 | — | 1.001 (0.965–1.038) | 0.971 |  | 1.008 (0.973–1.034) | 0.700 |  |
|  | Q3 | — | 0.980 (0.954–1.006) | 0.135 |  | 0.978 (0.949–1.007) | 0.136 |  |
| PLT | Q1 | — | 0.982 (0.951–1.014) | 0.265 | 0.258 | 0.988 (0.953–1.023) | 0.490 | 0.136 |
|  | Q2 | — | 0.961 (0.931–0.992) | 0.014 |  | 0.964 (0.933–0.997) | 0.033 |  |
|  | Q3 | — | 0.994 (0.967–1.021) | 0.660 |  | 1.000 (0.971–1.030) | 0.984 |  |
| Location of Disease | Medial Perforating Branches | — | 0.980 (0.959–1.002） | 0.071 | 0.663 | 0.983 (0.961–1.006) | 0.148 | 0.826 |
|  | Pons | — | 0.986 (0.960–1.013) | 0.308 |  | 0.984 (0.957–1.012) | 0.255 |  |
| Baseline NIHSS | < 3 | — | 0.986 (0.966–1.007) | 0.193 | 0.565 | 0.990 (0.968–1.012) | 0.359 | 0.414 |
|  | ≥ 3 | — | 0.979 (0.953–1.006) | 0.129 |  | 0.980 (0.952–1.009) | 0.179 |  |
| Smoking History | No | — | 0.994 (0.974–1.015) | 0.572 | 0.17 | 0.997 (0.976–1.019) | 0.799 | 0.069 |
|  | Yes | — | 0.964 (0.936–0.993) | 0.014 |  | 0.967 (0.938–0.997) | 0.029 |  |
| Site of Disease | Middle Cerebral Artery Perforating Branch | — | 0.980 (0.959–1.002) | 0.071 | 0.571 | 0.983 (0.961–1.006) | 0.148 | 0.826 |
|  | Pontine Artery Perforating Branch | — | 0.986 (0.960–1.013) | 0.308 |  | 0.984 (0.957–1.012) | 0.255 |  |

Notes: Outcome Event: Represents the interaction between HCT levels and various demographic, clinical, and anatomical factors, measured by the change in NIHSS scores (ΔNIHSS ≥ 3 Points). Odds Ratios (OR): Presented with 95% confidence intervals (CI). Model 1 represents unadjusted analyses. Model 2 adjusts for age and sex. Model 3 further adjusts for significant univariate predictors and clinically relevant variables. P-Values: P-values less than 0.05 are considered statistically significant and are indicated in bold. P-Value for Interaction: Indicates the significance of the interaction between HCT levels and each variable or condition. Abbreviations: HCT = Hematocrit; NIHSS = National Institutes of Health Stroke Scale; MPV = Mean Platelet Volume; PLT = Platelet Count.
